# Supplementary material
Source: publisher site journal article supplement (https://www.dovepress.com/article/524634)
Supplement: Supplementary file 1 [file 524634%20Appendix%20-%20Tables%20A1-A3.docx]

**Table A1: JBI Critical appraisal tool for case series.**

|  | **Damsky 202012** | **Yunoki 202515** | **Kim D 202516** | **Khurana 202520** | **McPhie M 202123** | **Bosch-Amate 202225** | **Dev A 202426** | **Zheng 202433** |
| --- | --- | --- | --- | --- | --- | --- | --- | --- |
| **Were there clear criteria for inclusion in the case series?** | Yes | No | No | No | No | Unclear | Yes | Yes |
| **Was the condition measured in a standard, reliable way for all participants included in the case series?** | Yes | Yes | Yes | Yes | Yes | Yes | Yes | Yes |
| **Were valid methods used for identification of the condition for all participants included in the case series?** | Yes | Yes | Yes | No | Yes | Yes | Yes | No |
| **Did the case series have consecutive inclusion of participants?** | Yes | Unclear | Unclear | Unclear | Yes | Unclear | Yes | Unclear |
| **Did the case series have complete inclusion of participants?** | Unclear | Unclear | Unclear | Unclear | Unclear | Unclear | Yes | Unclear |
| **Was there clear reporting of the demographics of the participants in the study?** | Yes | Yes | Yes | Yes | Yes | Yes | Yes | Yes |
| **Was there clear reporting of clinical information of the participants?** | Yes | Yes | Yes | Yes | Yes | Yes | Yes | Yes |
| **Were the outcomes or follow up results of cases clearly reported?** | Yes | Yes | Yes | Yes | Yes | Yes | Yes | Yes |
| **Was there clear reporting of the presenting site(s)/clinic(s) demographic information?** | Yes | No | No | No | Yes | Yes | Yes | Yes |
| **Was statistical analysis appropriate?** | Yes | n/a | n/a | n/a | n/a | n/a | Yes | n/a |
| **OVERALL** | Include | Include | Include | Include | Include | Include | Include | Include |

**Table A2: JBI Critical appraisal tool for case reports.**

|  | **Michels A 202414** | **Ball-ova A 202217** | **Jadoul A 202318** | **Yan T 202219** | **Kim A 202421** | **Durgin J 202022** | **Chen Y 202427** | **De Greef A 202428** | **Coican A 202429** | **Sonder-mann W 202130** | **Slater K 202331** | **Trees A 202432** | **Piont-kowski A 202434** |
| --- | --- | --- | --- | --- | --- | --- | --- | --- | --- | --- | --- | --- | --- |
| **Were patient’s demographic characteristics clearly described?** | Yes | Yes | Yes | Yes | Yes | Yes | Yes | Yes | Yes | Yes | Yes | Yes | Yes |
| **Was the patient’s history clearly described and presented as a timeline?** | Yes | Yes | Yes | Yes | Yes | Yes | Yes | Yes | Yes | Yes | Yes | Yes | Yes |
| **Was the current clinical condition of the patient on presentation clearly described?** | Yes | Yes | Yes | Yes | Yes | Yes | Yes | Yes | Yes | Yes | Yes | Yes | Yes |
| **Were diagnostic tests or assessment methods and the results clearly described?** | Yes | Yes | Yes | Yes | Yes | Yes | Yes | Yes | Yes | Yes | Yes | Yes | Yes |
| **Was the intervention(s) or treatment procedure(s) clearly described?** | Yes | Yes | Yes | Yes | Yes | Yes | Yes | Yes | Yes | Yes | Yes | Yes | Yes |
| **Was the post-intervention clinical condition clearly described?** | Yes | Yes | Yes | Yes | Yes | Yes | Yes | Yes | Yes | Yes | Yes | Yes | Yes |
| **Were adverse events (harms) or unanticipated events identified and described?** | No | Yes | No | Yes | Yes | Yes | No | Yes | Yes | No | Yes | Yes | Yes |
| **Does the case report provide takeaway lessons?** | Yes | Yes | Yes | Yes | Yes | Yes | Yes | Yes | Yes | Yes | Yes | Yes | Yes |
| **OVER-ALL** | Include | Include | Include | Include | Include | Include | Include | Include | Include | Include | Include | Include | Include |

**Table A3: Robins-I Tool (Risk Of Bias In Non-randomized Studies - of Interventions)**

|  | **Risk Level** | **Comment** |
| --- | --- | --- |
| **Bias due to confounding** | Moderate Risk | The trial does not include a control group for comparison. Potential confounding factors (e.g., disease severity, comorbidities) were not adjusted for since the trial was uncontrolled. |
| **Bias in selection of participants into the study** | Low Risk | Clear eligibility criteria were applied: patients had severe, long-standing, treatment-refractory granuloma annulare. All enrolled patients seem representative of this specific population. |
| **Bias in Classification of Interventions** | Low Risk | The intervention (tofacitinib 5 mg BID) is well defined and consistently applied across participants. |
| **Bias due to deviations from intended interventions** | Low to Moderate Risk | The study was open-label (no blinding), which could affect adherence or reporting of outcomes. However, concomitant medications were restricted (patients were not allowed other GA treatments), minimizing deviations. |
| **Bias due to missing data** | Low Risk | No significant missing outcome data were reported. All 5 participants completed the study. |
| **Bias in Measurement of outcomes** | Moderate Risk | The trial relied on clinical assessments of BSA involvement, histology, and cytokine levels. Outcome assessors were not blinded, increasing potential measurement bias, especially for subjective measures like BSA or quality of life (Skindex-16). |
| **Bias in Selection of the Reported Result** | Low Risk | The clinical trial was registered (NCT03910543), and prespecified outcomes (BSA involvement, cytokine changes) were reported. Results align with the trial objectives. |
| **OVERALL** | Moderate Risk |  |
